42. Takarada-Iemata M, Kezuka D, Takeichi T, Ikawa M, Hattori T, Kitao Y, Hori O: Deletion of N-myc downstream-regulated gene 2 attenuates reactive astrogliosis and inflammatory response in a mouse model of cortical stab injury. *J Neurochem* 2014; 130:374–87
43. Wang F, Gao Z, Li X, Li Y, Li X, Zhong H, Xu N, Cao F, Wang Q, Xiong L: NDRG2 is involved in anti-apoptosis induced by electroacupuncture pretreatment after focal cerebral ischemia in rats. *Neurol Res* 2013; 35:406–14
44. Xuan AG, Chen Y, Long DH, Zhang M, Ji WD, Zhang WJ, Liu JH, Hong LP, He XS, Chen WL: PPARα agonist fenofibrate ameliorates learning and memory deficits in rats following global cerebral ischemia. *Mol Neurobiol* 2015; 52:601–9
45. Webster CM, Kelly S, Koike MA, Chock VY, Giffard RG, Yenari MA: Inflammation and NFκB activation is decreased by hypothermia following global cerebral ischemia. *Neurobiol Dis* 2009; 33:301–12

## ANESTHESIOLOGY REFLECTIONS FROM THE WOOD LIBRARY-MUSEUM

### Eucaïne Lactate from H. K. Mulford Company of Philadelphia

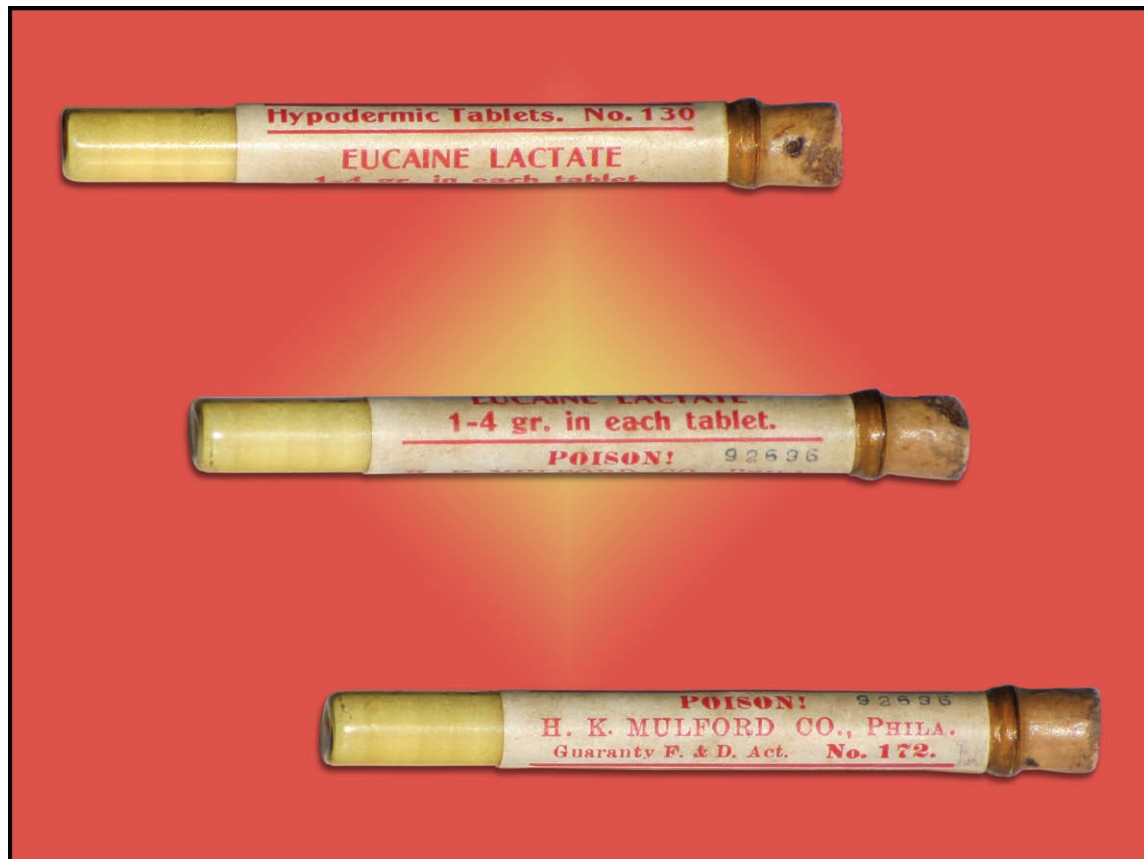

Using a pharmacy schoolmate's financing and presidential leadership, Henry K. Mulford (1866 to 1937) reorganized his own namesake corporation in 1891 with himself as vice president. Soon "H. K. Mulford Company of Philadelphia" began synthesizing and compounding an astonishing array of pharmaceuticals, including (beta)-eucaïne lactate. Less toxic than alpha-eucaïne, beta-eucaïne had the additional advantage of stability in aqueous solutions sterilized by prolonged boiling. Sold by Mulford as "one-quarter grain" hypodermic tablets (*above*), the lactate formulation of eucaïne was less irritating to patients than was the hydrochlorate one. (Copyright © the American Society of Anesthesiologists' Wood Library-Museum of Anesthesiology.)

*George S. Bause, M.D., M.P.H., Honorary Curator and Laureate of the History of Anesthesia, Wood Library-Museum of Anesthesiology, Schaumburg, Illinois, and Clinical Associate Professor, Case Western Reserve University, Cleveland, Ohio. UJYC@aol.com.*
